# Supplementary material
Source: Elsevier journal article supplement (https://www.sciencedirect.com/science/article/pii/S1699258X17302267)
Supplement: mmc1 [file S1699258X17302267:mmc1.pdf]

## Figura 2. Versión venezolana del cuestionario BASFI.

Nombre: \_\_\_\_\_ Fecha: \_\_\_\_/\_\_\_\_/\_\_\_\_

Por favor coloque una marca en la línea , para indicar su capacidad en las siguientes actividades , **durante la semana pasada.**

1. Ponerse las medias o medias panty sin ayuda (de ningún tipo )

Fácil \_\_\_\_\_ Imposible

2. Doblarse para recoger un lápiz del suelo sin ayuda

Fácil \_\_\_\_\_ Imposible

3. Alcanzar algo de un estante alto sin ayuda

Fácil \_\_\_\_\_ Imposible

4. Levantarse de una silla, sin apoyar brazos, sin usar sus manos o cualquier otra ayuda.

Fácil \_\_\_\_\_ Imposible

5. Levantarse sin ayuda estando acostado(a) boca arriba en el piso

Fácil \_\_\_\_\_ Imposible

6. Permanecer de pie y sin apoyo durante 10 minutos sin sentir molestias

Fácil \_\_\_\_\_ Imposible

7. Subir 12 a 15 escalones sin usar el pasamanos, andadera o cualquier otra ayuda manual (colocando un pie en cada escalón).

Fácil \_\_\_\_\_ Imposible

8. Mirar por encima de su hombro sin voltear su cuerpo

Fácil \_\_\_\_\_ Imposible

9. Realizar actividades físicas fuertes (ejercicios de fisioterapia, jardinería o deportes).

Fácil \_\_\_\_\_ Imposible

10. Realizar un día completo de actividades en la casa o en el trabajo

Fácil \_\_\_\_\_ Imposible
